# Supplementary material
Source: PubMed Central journal article supplement (PMC7612309)

Figure S1: Adjusted means for body size and adiposity markers by sleep duration (adjusted for sex, age quartiles, month, ethnicity, social position, observer (physical measures only) and random effect for school).

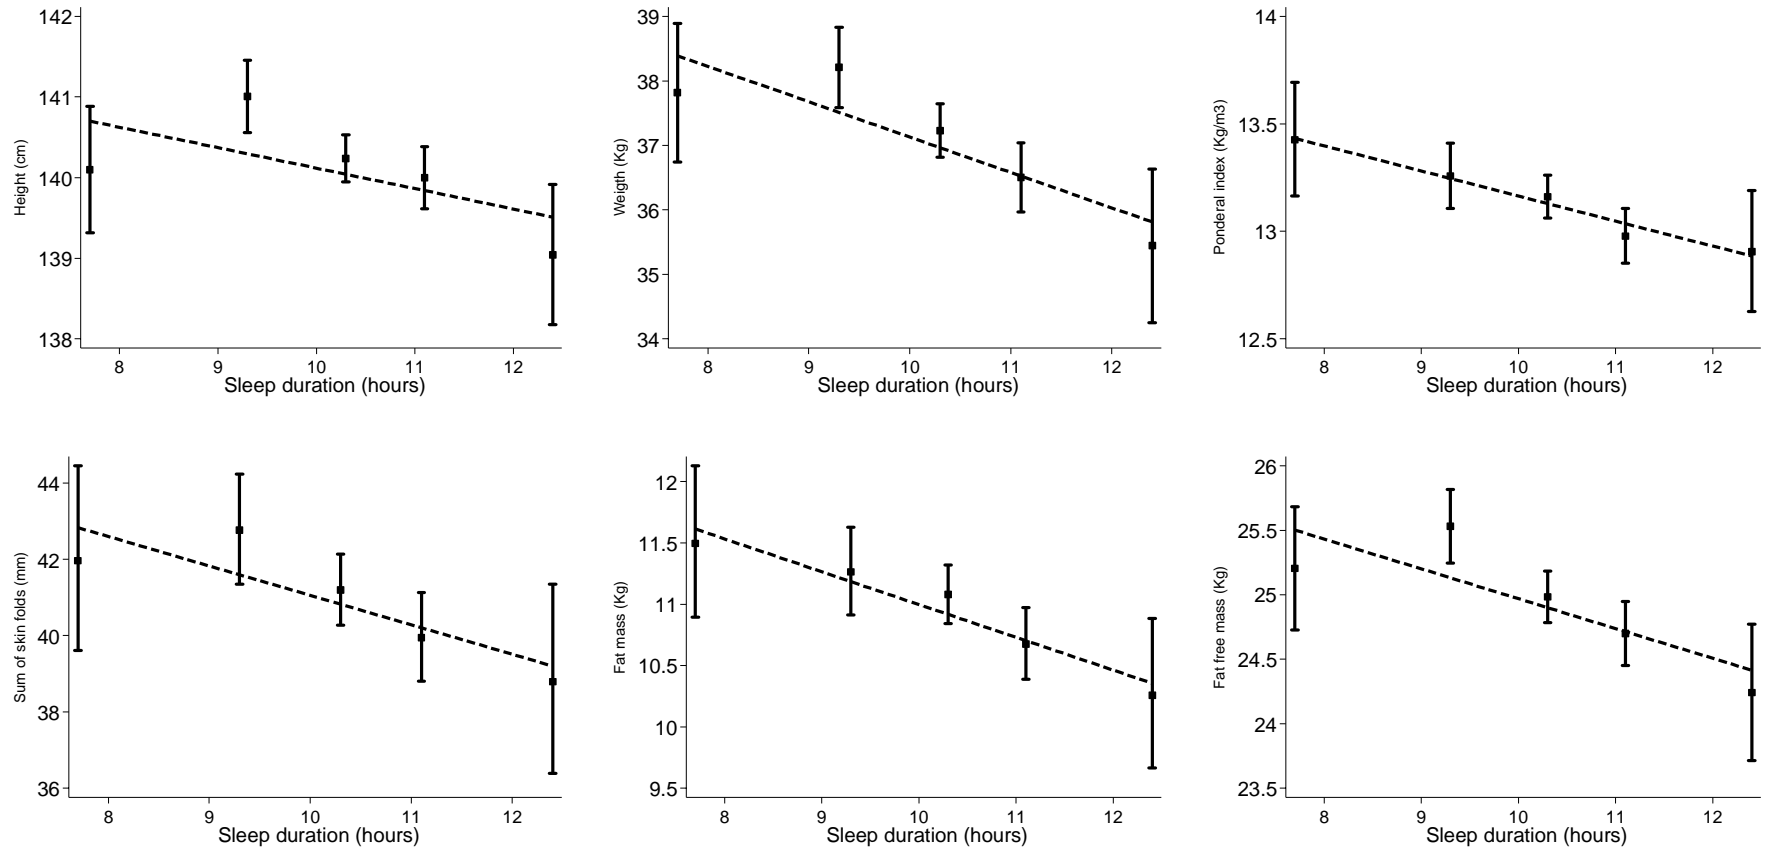

Supplement: EMS140945-supplement-Suppl_Figure_1.pdf [file EMS140945-supplement-Suppl_Figure_1.pdf]
